# Supplementary material for: Structural Proteomics-Driven Targeted Design of Favipiravir-Binding Site in The RdRp of SARS-CoV-2 Unravels Susceptible Hotspots and Resistance Mutations
Source: Preprints.org preprint supplement (doi:10.20944/preprints202105.0492.v1), 2021-05-20
Supplement: Supplementary file 1 [file supplementary]

# **Structural proteomics-driven targeted design of favipiravir-binding site in the RdRp of SARS-CoV-2 unravels susceptible hotspots and resistance mutations**

Aditya K. Padhi<sup>1</sup>, Jagneshwar Dandapat<sup>2,3</sup>, Vladimir N. Uversky<sup>4</sup>, and Timir Tripathi<sup>5\*</sup>

<sup>1</sup>Laboratory for Structural Bioinformatics, Center for Biosystems Dynamics Research, RIKEN, Yokohama, Kanagawa 230-0045, Japan

<sup>2</sup>Centre of Excellence in Integrated Omics and Computational Biology, Utkal University, Bhubaneswar 751004, Odisha, India

<sup>3</sup>Post Graduate Department of Biotechnology, Utkal University, Bhubaneswar 751004, Odisha, India

<sup>4</sup>Department of Molecular Medicine and Byrd Alzheimer's Research Institute, Morsani College of Medicine, University of South Florida, Tampa, FL 33620, United States

<sup>5</sup>Molecular and Structural Biophysics Laboratory, Department of Biochemistry, North-Eastern Hill University, Shillong- 793022, India

## **\*Corresponding author:**

Dr. Timir Tripathi, Department of Biochemistry, North-Eastern Hill University, Shillong- 793022, India. Email: [timir.tripathi@gmail.com](mailto:timir.tripathi@gmail.com), Tel: +91-364-2722141; Fax: +91-364-2550108

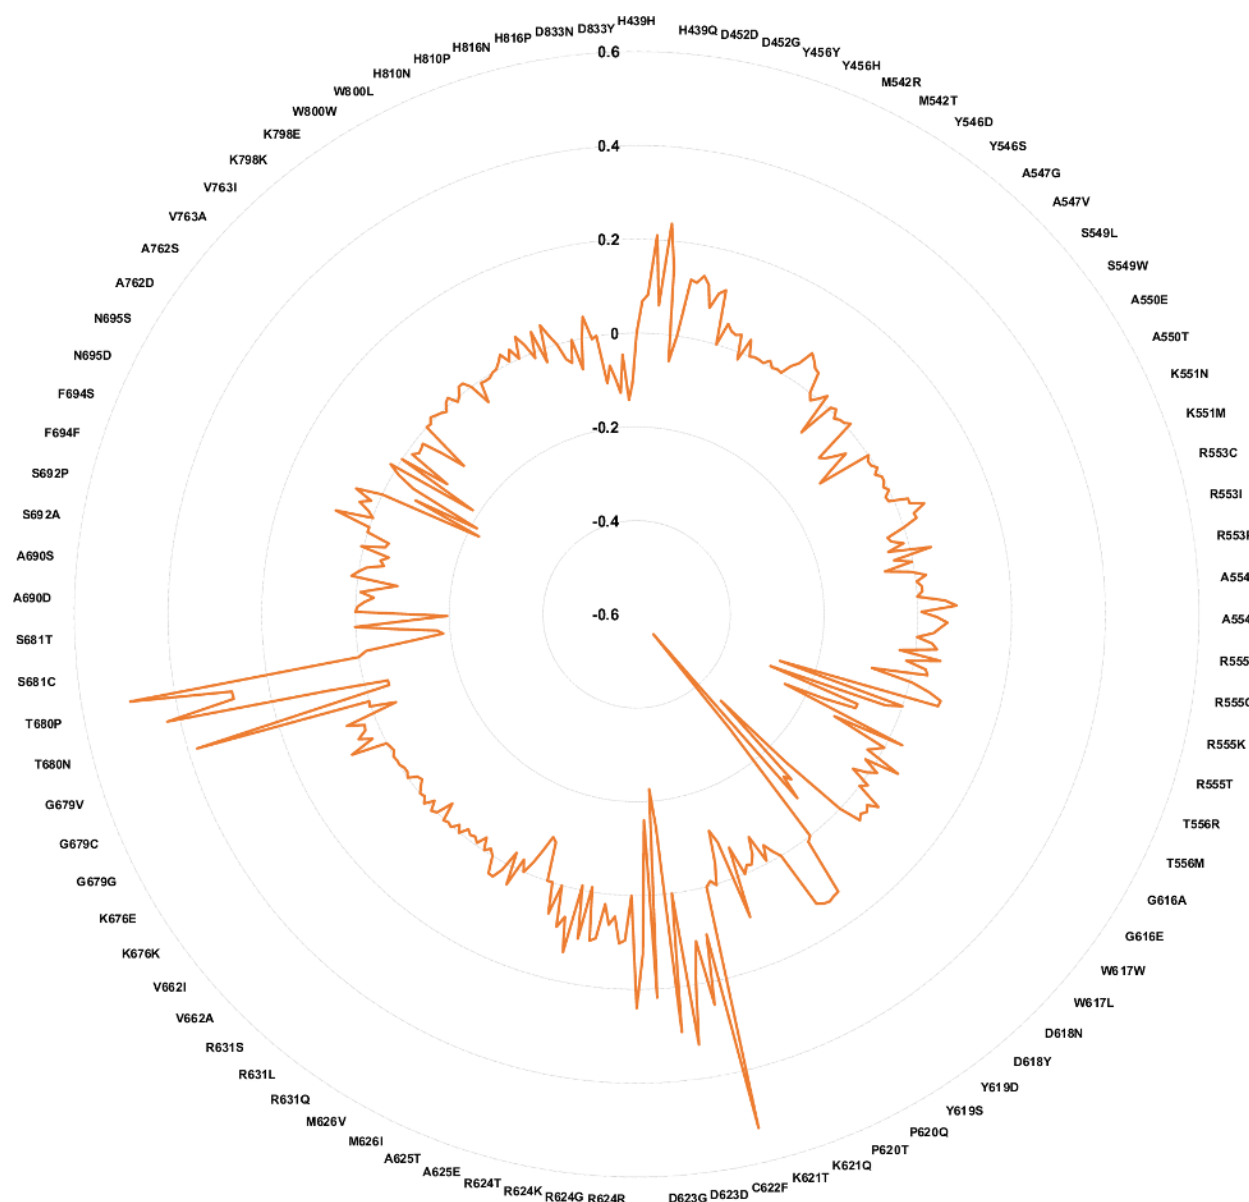

**Supplementary Figure 1. Relative binding affinities of all the 350 designs from the favipiravir-interacting nsp12 residues.** Radar plot showing the MOE-computed relative binding affinities (dAffinities) for all the 350 favipiravir-interacting nsp12 designs. The dAffinity values range from -0.54 to 0.52 kcal/mol.

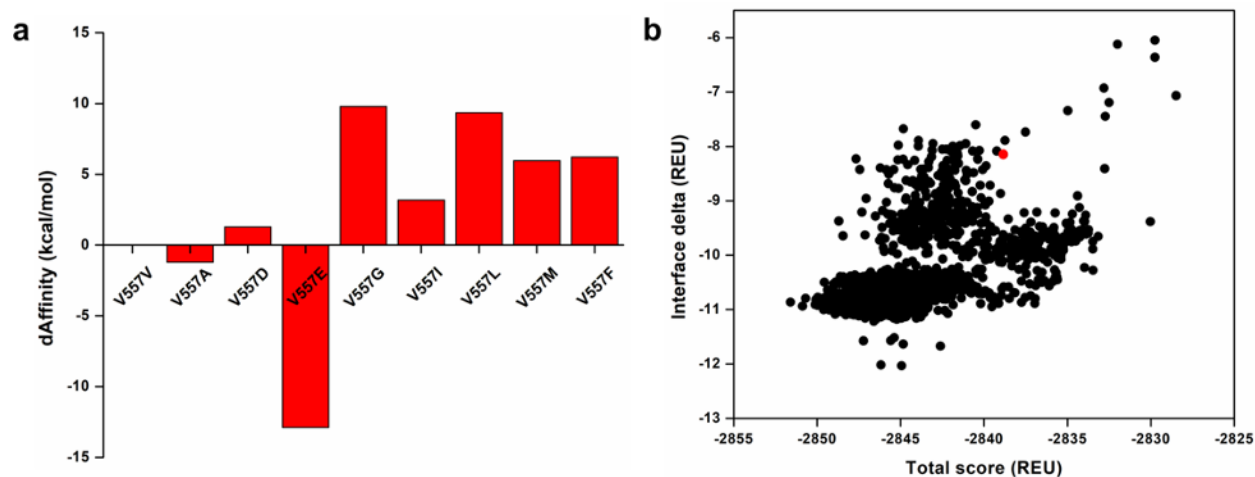

**Supplementary Figure 2. MOE- and Rosetta-based binding affinity scores for the V557L remdesivir-resistant mutant of SARS-CoV.** (a) MOE- and (b) Rosetta-based binding affinity scores showing the V557L design was among the low-affinity designs against remdesivir, indicating its potential role in the emergence of drug resistance.
